# Supplementary material for: Invasion genomics uncover contrasting scenarios of genetic diversity in a widespread marine invader
Source: PubMed Central journal article supplement — Proc Natl Acad Sci U S A. 2021 Dec 15;118(51):e2116211118. doi: 10.1073/pnas.2116211118 (PMC8713979; doi:10.1073/pnas.2116211118), 2021-12-15
Supplement: pnas.2116211118.sapp.pdf [file pnas.2116211118.sapp.pdf]

## Supplementary Information for

### Invasion genomics uncover contrasting scenarios of genetic diversity in a widespread marine invader

Cornelia Jaspers<sup>a,b,1,2</sup>, Moritz Ehrlich<sup>b,1,3</sup>, José Martin Pujolar<sup>a,1</sup>, Sven Künzel<sup>c</sup>, Till Bayer<sup>b</sup>, Morten T. Limborg<sup>d</sup>, Fabien Lombard<sup>e</sup>, William E. Browne<sup>f</sup>, Kremena Stefanova<sup>g</sup>, and Thorsten B.H. Reusch<sup>b,2</sup>

<sup>a</sup>Centre for Gelatinous Plankton Ecology and Evolution, DTU Aqua - Technical University of Denmark, 2800 Kgs. Lyngby, Denmark; <sup>b</sup>Marine Evolutionary Ecology, GEOMAR Helmholtz Centre for Ocean Research Kiel, 24105 Kiel, Germany; <sup>c</sup>Evolutionary Genetics, Max Planck Institute for Evolutionary Biology, Plön 24306, Germany; <sup>d</sup>Center for Evolutionary Hologenomics, GLOBE Institute, University of Copenhagen, 1353 Copenhagen, Denmark; <sup>e</sup>Laboratoire d'Océanographie de Villefranche, Sorbonne Université, 06230 Villefranche-sur-mer, France; <sup>f</sup>Department of Biology, University of Miami, Coral Gables, FL 33124, USA; and <sup>g</sup>Marine Biology and Ecology Department, Institute of Oceanology, Bulgarian Academy of Science, 9000 Varna, Bulgaria

<sup>1</sup>Contributed equally to this work; <sup>2</sup>To whom correspondence may be addressed. Email: coja@aqua.dtu.dk or treusch@geomar.de; <sup>3</sup>Present address: Rosenstiel School of Marine and Atmospheric Science, University of Miami, Miami, FL 33149, USA.

#### This PDF file includes:

Figures S1 to S2  
Tables S1 to S3  
SI References

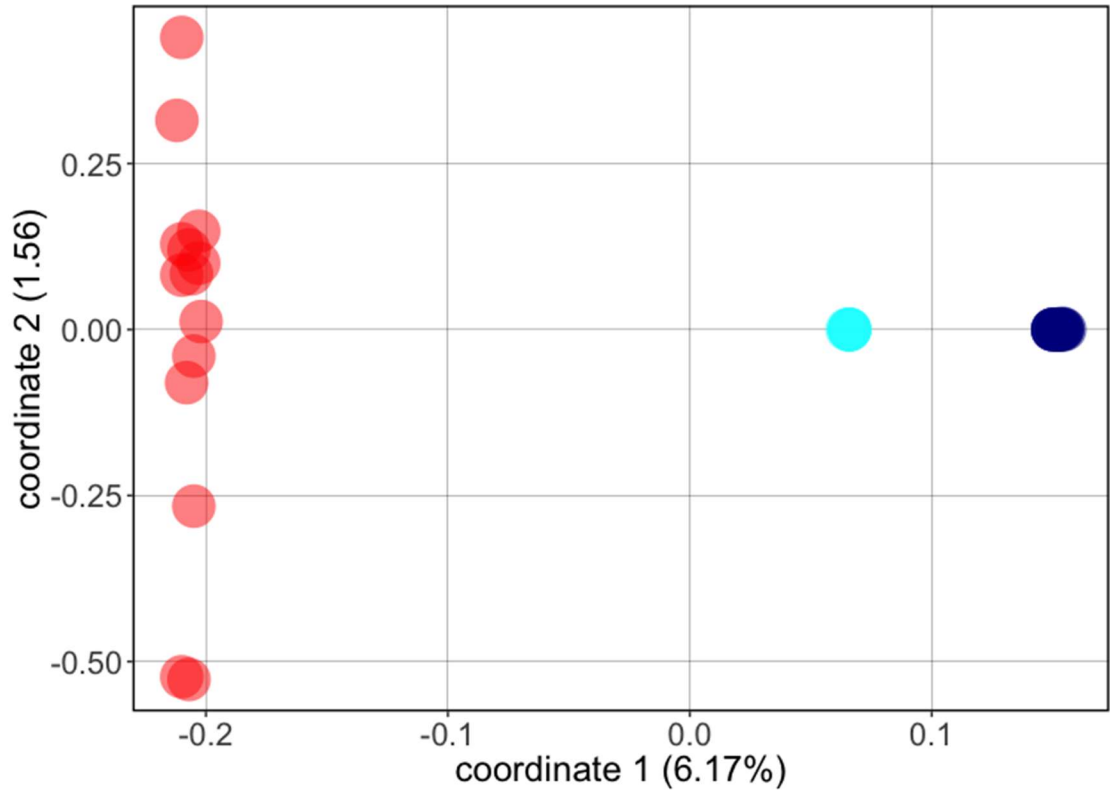

**Fig. S1.** PCA Plot for all native populations in our study including the northern (Woods Hole, blue) and the southern (Florida, red) populations together with the population from Chesapeake Bay (light blue) obtained from Verwimp et al. (2019). Note: kinship analyses confirm close relationship of all animals included in the Verwimp et al. (2019) analyses.

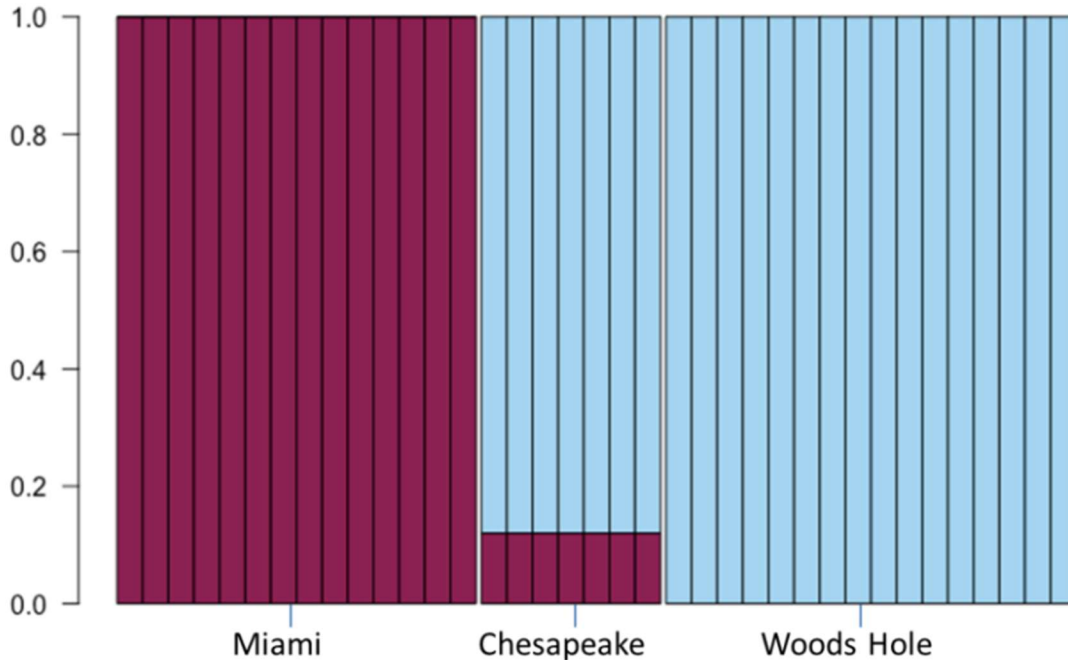

**Fig. S2. Admixture analysis using Structure for all native populations in our study including the northern (Woods Hole) and the southern population (Florida) together with the population from Chesapeake Bay obtained from Verwimp et al. (2019).** Individuals were assigned on the basis of the most likely K, in this case ( $K = 2$ ). Admixture proportions are shown for all individuals, each individual represented by a vertical bar. Note: kinship analyses confirm close relationship of all animals included in the Verwimp et al. (2019) analyses. Recently, Verwimp et al. (2019) claimed a reduction of genetic diversity when comparing the native North American population (Chesapeake Bay) and the North Sea using a genotyping-by-sequencing approach. Re-analysis of Chesapeake Bay individuals from Verwimp et al. (2019) together with our individuals from Miami and Woods Hole using admixture analysis in Structure showed all Chesapeake Bay individuals to be introgressed, while no admixture was detected in Florida or Woods Hole. Hence, the Chesapeake Bay individuals included in Verwimp et al. (2019) are not the source population of the North Sea invasion and represent introgressed individuals with the southern native population, which would explain their higher genetic diversity.

**Table S1.** Sampling details including sampling location, number of individuals, geographical coordinates and first record of *M. leidy* in each location.

| <b>Location</b>      | <b>Region</b>         | <b>N</b> | <b>Year</b> | <b>Latitude</b> | <b>Longitude</b> | <b>First Record</b> |
|----------------------|-----------------------|----------|-------------|-----------------|------------------|---------------------|
| Miami                | Florida               | 15       | 2016        | 25°36'53"N      | 80°18'19"W       | Native location     |
| Woods Hole           | New England           | 16       | 2016        | 41°31'21"N      | 70°40'28"W       | Native location     |
| Varna                | Western Black Sea     | 16       | 2016        | 43°11'02"N      | 27°54'01"E       | 1986                |
| Villefranche-sur-mer | Western Mediterranean | 9        | 2016        | 43°41'18"N      | 7°18'53"E        | 2009                |
| Sylt                 | North Sea             | 16       | 2016        | 55°01'01"N      | 8°26'25"E        | 2006                |

**Table S2. Nucleotide diversity ( $\pi$ ) calculated for each location, (a) using 1,632,777 SNPs after filtering for linkage disequilibrium and a 80% call rate and (b) using 77,103 SNPs after re-sizing to 9 individuals for each population. SE = Standard error.**

| Status   | Location     | a)<br>full SNP set |       | b)<br>re-sized SNP set |       |
|----------|--------------|--------------------|-------|------------------------|-------|
|          |              | $\pi$              | SE    | $\pi$                  | SE    |
| Native   | Miami        | 0.13               | 0.006 | 0.12                   | 0.006 |
|          | Woods Hole   | 0.06               | 0.004 | 0.06                   | 0.005 |
| Invasive | Varna        | 0.13               | 0.005 | 0.11                   | 0.006 |
|          | Villefranche | 0.10               | 0.006 | 0.09                   | 0.006 |
|          | Sylt         | 0.08               | 0.006 | 0.06                   | 0.005 |

**Table S3. Coalescence approach using two different models to assess the invasion routes and stepping-stone range expansion of *Mnemiopsis leidyi* in western Eurasia.** Fastsimcoal2 (I) separated into the southern and northern invasion events (a) and splitting the southern invasion into two scenarios with (b) a stepping stone range expansion from the Black Sea (Varna) to the western Mediterranean Sea (Villefranche) and (c) a direct secondary introduction from the native range (Miami, USA). Scenarios b and c are compared with the DIYABC model (II). Inferred parameter values included estimates of current effective population size ( $N_e$ ) and their confidence intervals (CI). In Fastsimcoal2 mutation rate was allowed to vary ( $1 \times 10^{-7}$ - $1 \times 10^{-9}$ ), the best model, was chosen using Akaike information criterion (AIC). Log likelihood ratio (logL), number of parameters estimated ( $N_p$ ) and delta AIC, relative to the best model (dAIC). PSMC plot is based on the average mutation rate of northern and southern invasions (Ia) of  $6.85 \times 10^{-8}$ .

| <b>I) Fastsimcoal2</b>         |                         |                                         |                      |                                |                         |                         |                      |
|--------------------------------|-------------------------|-----------------------------------------|----------------------|--------------------------------|-------------------------|-------------------------|----------------------|
| <b>a) Southern invasion</b>    | <b><math>N_e</math></b> | <b>CI</b>                               |                      | <b>Northern invasion</b>       | <b><math>N_e</math></b> | <b>CI</b>               |                      |
| Miami                          | 11,271                  | 9,323                                   | 12,043               | Sylt                           | 4,283                   | 3,713                   | 4,498                |
| Varna                          | 11,606                  | 10,093                                  | 13,405               | Woods Hole                     | 212,661                 | 160,224                 | 227,777              |
| Villefranche                   | 844                     | 773                                     | 943                  |                                |                         |                         |                      |
| Mutation rate                  | $7.6 \times 10^{-8}$    | $7.3 \times 10^{-8}$                    | $7.6 \times 10^{-8}$ | Mutation rate                  | $6.1 \times 10^{-8}$    | $5.7 \times 10^{-8}$    | $6.5 \times 10^{-8}$ |
| <b>b) Varna - Villefranche</b> |                         |                                         |                      | <b>c) Miami - Villefranche</b> |                         |                         |                      |
| Miami                          | 11,271                  | 9,323                                   | 12,043               | N Miami                        | 20,450                  | 15,560                  | 28,276               |
| Varna                          | 11,606                  | 10,093                                  | 13,405               | N Varna                        | 11,264                  | 9,019                   | 11,776               |
| Villefranche                   | 844                     | 773                                     | 943                  | N Villefranche                 | 758                     | 713                     | 852                  |
| <b>Model comparison:</b>       | <b>logL</b>             | <b><math>N_p</math></b>                 | <b>AIC/dAIC</b>      |                                | <b>logL</b>             | <b><math>N_p</math></b> | <b>AIC/dAIC</b>      |
| Varna - Villefranche           | -584,310                | 4                                       | 1,168,128 / 0        | Miami - Villefranche           | -586,846                | 4                       | 1,173,700 / 5,072    |
| <b>II) DIYABC</b>              |                         | <b>Best Model: Varna - Villefranche</b> |                      |                                | <b><math>N_e</math></b> | <b>CI</b>               |                      |
|                                |                         |                                         |                      | Miami                          | 2850                    | 816                     | 8,300                |
|                                |                         |                                         |                      | Varna                          | 1880                    | 561                     | 5,920                |
|                                |                         |                                         |                      | Villefranche                   | 397                     | 161                     | 905                  |

## SI References

C. Verwimp, L. Vansteenbrugge, S. Derycke, T. Kerkhove, H. Muylle, O. Honnay, T. Ruttink, I. Roldán-Ruiz, K. Hostens, Population genomic structure of the gelatinous zooplankton species *Mnemiopsis leidyi* in its nonindigenous range in the North Sea. *Ecol. Evol.* **10**, 11-25 (2019).
